# Supplementary material
Source: publisher figshare collection journal article supplement (https://sage.figshare.com/ndownloader/files/16639007)
Supplement: Supplementary file 1 [file 16639007]

### Supplemental Table S1

Percentage of Patients in Ultrasound Substudy with **Obstruction\***  
in each evaluated venous segment at 12 months

| <b>Venous Segment</b>                | <b>Total<br/>(N=123)</b> | <b>PCDT<br/>(N=60)</b> | <b>Control<br/>(N=63)</b> |
|--------------------------------------|--------------------------|------------------------|---------------------------|
| CFV Obstructed, <i>n (%)</i>         | 1 (0.8%)                 | 0 (0.0%)               | 1 (1.6%)                  |
| FV Obstructed, <i>n (%)</i>          | 8 (6.5%)                 | 3 (5.0%)               | 5 (7.9%)                  |
| Profunda FV Obstructed, <i>n (%)</i> | 0 (0.0%)                 | 0 (0.0%)               | 0 (0.0%)                  |
| Popliteal Obstructed, <i>n (%)</i>   | 2 (1.6%)                 | 1 (1.7%)               | 1 (1.6%)                  |
| GSV Obstructed, <i>n (%)</i>         | 0 (0.0%)                 | 0 (0.0%)               | 0 (0.0%)                  |
| Iliac Obstructed, <i>n (%)</i>       | 1 (0.8%)                 | 0 (0.0%)               | 1 (1.6%)                  |

\* Complete absence of flow on color and spectral Doppler

CFV=Common Femoral Vein, FV=Femoral Vein, GSV=Great Saphenous Vein,

SSV=Small Saphenous Vein

### Supplemental Table S2

Percentage of Patients in Ultrasound Substudy with **Reflux**  
in each evaluated venous segment at 12 months

| <b>Venous Segment</b>            | <b>Total</b> | <b>PCDT</b>   | <b>Control</b> |
|----------------------------------|--------------|---------------|----------------|
| CFV Reflux, <i>n (%)</i>         | 46/123 (37%) | 23/60 (38.3%) | 23/63 (36.5%)  |
| FV Reflux, <i>n (%)</i>          | 74/122 (61%) | 33/60 (55.0%) | 41/62 (66.1%)  |
| Profunda FV Reflux, <i>n (%)</i> | 21/123 (17%) | 7/60 (11.7%)  | 14/63 (22.2%)  |
| Popliteal Reflux, <i>n (%)</i>   | 84/123 (68%) | 38/60 (63.3%) | 46/63 (73.0%)  |
| GSV Reflux, <i>n (%)</i>         | 29/123 (24%) | 16/60 (26.7%) | 13/63 (20.6%)  |
| SSV Reflux, <i>n (%)</i>         | 30/123 (24%) | 14/60 (23.3%) | 16/63 (25.4%)  |

### Supplemental Table S3

Association of restoration of venous non-compressibility at 1 month with late outcomes

| Clinical Outcome |                                                 | Status of CFV at 1 Month for Patients with Non-Compressible CFV at Baseline |              |         | Status of FV and PV at 1 Month for Patients with Compressible CFV at Baseline |                   |         |
|------------------|-------------------------------------------------|-----------------------------------------------------------------------------|--------------|---------|-------------------------------------------------------------------------------|-------------------|---------|
|                  |                                                 | Non-compressible                                                            | Compressible | p-value | Either non-compressible                                                       | Both compressible | p-value |
| Overall Trial    | Any PTS, <i>n (%)</i>                           | 91/147 (62%)                                                                | 82/179 (46%) | 0.004   | 99/220 (45%)                                                                  | 22/46 (48%)       | 0.73    |
|                  | Moderate-Severe PTS, <i>n (%)</i>               | 43/147 (29%)                                                                | 37/179 (21%) | 0.07    | 42/220 (19%)                                                                  | 9/46 (20%)        | 0.94    |
|                  | Villalta score at 24 months, <i>mean (SD)</i>   | 5.2 (6.0)                                                                   | 4.3 (4.8)    | 0.18    | 3.8 (4.5)                                                                     | 4.3 (4.5)         | 0.55    |
|                  | VCSS score at 24 months, <i>mean (SD)</i>       | 2.7 (3.4)                                                                   | 2.3 (3.0)    | 0.32    | 2.1 (2.7)                                                                     | 1.6 (1.7)         | 0.26    |
|                  | VEINES-QOL score at 24 months, <i>mean (SD)</i> | 73.0 (24)                                                                   | 80.3 (21)    | 0.01    | 82.4 (19)                                                                     | 75.7 (25)         | 0.09    |

CFV=Common Femoral Vein, FV=Femoral Vein, PV=Popliteal Vein, SD=Standard Deviation, VCSS=Venous Clinical Severity Score, VEINES-QOL=Venous Insufficiency Epidemiological and Economic Study Quality of Life, PTS=post-thrombotic syndrome
